# Supplementary material for: Designing self-assembling kinetics with differentiable statistical physics models
Source: PubMed Central journal article supplement — Proc Natl Acad Sci U S A. 2021 Mar 2;118(10):e2024083118. doi: 10.1073/pnas.2024083118 (PMC7958177; doi:10.1073/pnas.2024083118), 2021-03-02
Supplement: pnas.2024083118.sapp.pdf [file pnas.2024083118.sapp.pdf]

# Supplementary Information

Carl P. Goodrich<sup>a</sup>, Ella M. King<sup>b, 1</sup>, Samuel S. Schoenholz<sup>c</sup>, Ekin D. Cubuk<sup>c</sup>, and Michael Brenner<sup>a, b, c</sup>

<sup>a</sup>School of Engineering and Applied Sciences, Harvard University, Cambridge, MA 02138, USA; <sup>b</sup>Physics Department, Harvard University, Cambridge, MA 02138, USA; <sup>c</sup>Google Research, 1600 Amphitheatre Pkwy, Mountain View, CA

## 1. Molecular Dynamics simulations

We use Molecular Dynamics (MD) simulation in two ways. First, in Sec. I, we directly differentiate through MD simulations in order to optimize the honeycomb and triangular lattice assembly rates. Secondly, in Sec. II, we verify our optimized transition rates by running MD simulations and extracting transition rates from the simulations.

The MD simulations are performed using JAX MD (1), a molecular dynamics engine that is compatible with JAX (2), a freely-available automatic differentiation library. The system consists of a two- or three-dimensional box containing  $N$  particles at a constant temperature  $T$ . To simulate Brownian motion, the dynamics are given by the overdamped Langevin equation:

$$\dot{r}_\alpha = \gamma^{-1} F_\alpha + \sqrt{2k_B T \gamma^{-1}} f_\alpha(t) \quad [S1]$$

where  $F_\alpha$  is the net force on particle  $\alpha$ ,  $\gamma = 0.1$  is the friction coefficient,  $k_B$  is the Boltzmann constant, and the elements of  $f_\alpha(t)$  are uncorrelated Gaussian random variables with zero mean.

In the case of optimizing lattice assembly rates, we simulate  $N = 100$  particles that interact via Eq. (1). The particles interact within a square two-dimensional simulation box with periodic boundary conditions and sides of length 11.4 and 9.31 for assembling the honeycomb and triangular lattices, respectively. Simulations are performed at a temperature of  $k_B T = 0.1$  using a simulation step size of  $5 \times 10^{-5}$ .

In the case of verifying transition rates, we simulate  $N = 7$  particles that interact via a Morse potential of the form

$$V_{\alpha\beta}(r_{\alpha\beta}) = B_{\alpha\beta} \left( e^{-2a(r_{\alpha\beta} - \sigma)} - 2e^{-a(r_{\alpha\beta} - \sigma)} \right) \quad [S2]$$

where  $r_{\alpha\beta}$  is the separation between particles  $\alpha$  and  $\beta$ ,  $\sigma = 1$  is the particle diameter,  $a = 10$  determines the range of the attraction, and  $B_{\alpha\beta}$  is the binding energy between the spheres. Simulations are performed at a temperature of  $k_B T = 1$  in a three-dimensional simulation box with free boundary conditions using a step size of  $5 \times 10^{-6}$ .

## 2. Optimizing lattice assembly rates

**A. Forward mode AD.** To optimize our system, we use the RMSProp stochastic optimizer (3) with a learning rate of 0.1, a memory value of  $\gamma_{\text{mem}} = 0.9$ , and a smoothing value of  $\epsilon = 10^{-8}$ . The optimizer acts on a gradient that is determined via an average of 100 independent simulations, each with random initial positions.

The loss function we use for the optimization consists of specifying a “stencil”, or a fragment of a perfect lattice centered around a central particle. The stencil was created with a particle diameter of 1. A honeycomb lattice stencil and a triangular lattice stencil are both specified. At the end of a

simulation, we center the stencil on a particle  $\alpha$  and define the overlap function

$$O_\alpha(\theta) = \sum_{\beta, \beta'} e^{-\frac{(r_\beta - r_{\beta'}(\alpha, \theta))^2}{2\sigma^2}} \quad [S3]$$

where  $r_\beta$  is the position of particle  $\beta$  and  $r_{\beta'}(\alpha, \theta)$  is the position of the  $\beta'$  particle in the stencil when the stencil is centered on particle  $\alpha$  and rotated by an angle  $\theta$ . The maximum overlap of particle  $\alpha$  is

$$O_{\alpha, \text{opt}} = \max_\theta O_\alpha(\theta) \quad [S4]$$

and we define total overlap of the system to be

$$O = \max_\alpha O_{\alpha, \text{opt}}. \quad [S5]$$

We use a large stencil, ensuring that a significant overlap is clearly indicative of a honeycomb-like region. Additionally, the particles all interact identically. These two features allow us to use the maximum overlap as an indicator of crystallization. The assembly process as measured by the maximum overlap is contrasted with the assembly process as measured by the mean overlap in Fig. S1.

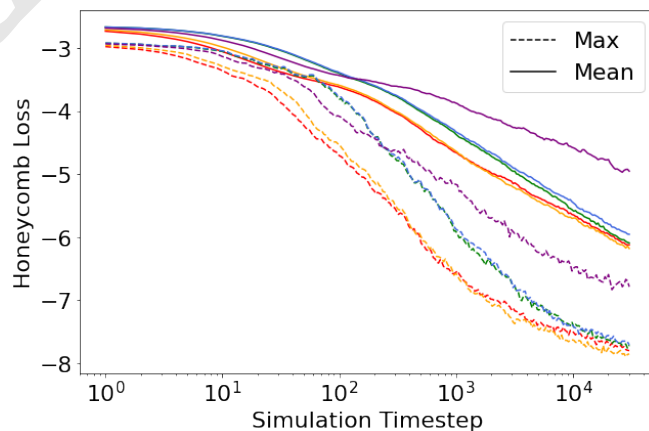

**Fig. S1.** Assembly process for honeycomb lattices with 5 different sets of parameters, where a given set of parameters is given by a distinct color. The parameters are the same as those used to generate the data in Fig. 2. The assembly process as measured by the maximum over  $O_{\alpha, \text{opt}}$  (as shown in S5) is given by dashed lines, whereas the assembly process as measured by the mean over  $O_{\alpha, \text{opt}}$  is given by solid lines. We see that the two measurements show the same trend, and both serve as similar indicators of crystallization.

We use a 13 particle stencil for the honeycomb overlap  $O_{\text{hon}}$ , and 7 particle stencil for the triangular overlap  $O_{\text{tri}}$ .

<sup>1</sup>Carl P. Goodrich contributed equally to this work with Ella M. King.

41 These together comprise the two loss functions, weighted as  
42 follows:

$$43 \quad L_H(t) = \frac{1}{N_H}(-O_{\text{hon}}(t) + \xi_H O_{\text{tri}}(t) + \zeta_H) \quad [\text{S6}]$$

$$44 \quad L_T(t) = \frac{1}{N_T}(O_{\text{hon}}(t) - \xi_T O_{\text{tri}}(t) + \zeta_T) \quad [\text{S7}]$$

45 with  $\xi_H = 1$  and  $\xi_T = \frac{10^4}{7}$ . We choose  $\zeta_{H,T}$  and  $N_{H,T}$  such  
46 that  $L_H$  and  $L_T$  range between 0 and 1, where  $L_{H,T} = 0$  for  
47 a perfect lattice.

We perform two rounds of optimization. For input rates  
 $k_H^* = 1/t_H^*$  and  $k_T^* = 1/t_T^*$ , the first round of optimization runs  
 $t^*$  steps and computes  $L = (L_H(t_H^*) - 0.5)^2 + (L_T(t_T^*) - 0.5)^2$   
for each of  $t_H^*$  and  $t_T^*$  under the appropriate density conditions.  
We then run the simulation for  $t^*$  more steps and compute  
 $L_H(2t_H^*)$  and  $L_T(2t_T^*)$  at the end of both simulations. The  
optimization loss function is a sum of both losses, namely (1)  
how close the system is to half-assembled after  $t^*$  steps and  
(2) how assembled the system is after  $2t^*$  steps:

$$L_{\text{opt}} = \sum_{H,T} (L(t^*) - 0.5)^2 + L(2t^*). \quad [\text{S8}]$$

48 The optimal parameters are the parameters associated with  
49 the minimum loss value over 1,000 RMSProp optimization  
50 steps. We then perform a second optimization, starting with  
51 these parameters, in which the optimization loss is restricted  
52 to  $L_{\text{opt}} = (L_H(t_H^*) - 0.5)^2 + (L_T(t_T^*) - 0.5)^2$ . In both rounds  
53 of optimization, we use forward mode automatic differentiation  
54 to calculate  $\frac{dL_{\text{opt}}}{da}$ , where  $a$  is the set of variable parameters  
55 in Eq. (1).

56 To validate optimization results, we calculate the rates  $k_H$   
57 and  $k_T$  by computing the losses  $L_H(t)$  and  $L_T(t)$  as a function  
58 of simulation time step. We then find the earliest timestep,  $t_0$ ,  
59 at which the loss is greater than half its optimal value, and  
60 the latest timestep,  $t_1$ , at which the loss is less than half its  
61 optimal value. Using data in the range  $(t_0 - 3, t_1 + 3)$ , we  
62 approximate a linear fit and use the fit to compute the time  
63  $t^*$  at which the loss function is exactly half its optimal value.

64 This method allows us to gain insight into a highly non-  
65 intuitive system by visualizing the results of the optimization.  
66 Each computation of the gradient of the potential provides  
67 information about the impact of the shape of the potential  
68 on the dynamics of the system. In figure S2, we compare our  
69 potential after many optimization steps to the final, optimized  
70 potential in (4). We also show the initial potential used to  
71 start the optimization. We see that our result captures much  
72 of the structure of the result found in (4), but rather than  
73 finding two local minima in the potential, we observe kinks in  
74 the potential in the corresponding locations. This may allow  
75 for faster transitions out of non-honeycomb-like metastable  
76 states.

**B. Reverse mode AD.** Performing reverse mode AD is more  
time efficient, but uses more memory. To conserve memory,  
we present an indirect approach to optimizing lattice assembly  
rates in which we only differentiate over the final 300 time  
steps of the simulation. Consider breaking the simulation up  
into two components. We first simulate for  $\tilde{\tau}$  time steps and  
find the configuration

$$R_{\tilde{\tau}} = \mathcal{S}_{\text{MD}}(a, R_0, \rho, \tilde{\tau}) \quad [\text{S9}]$$

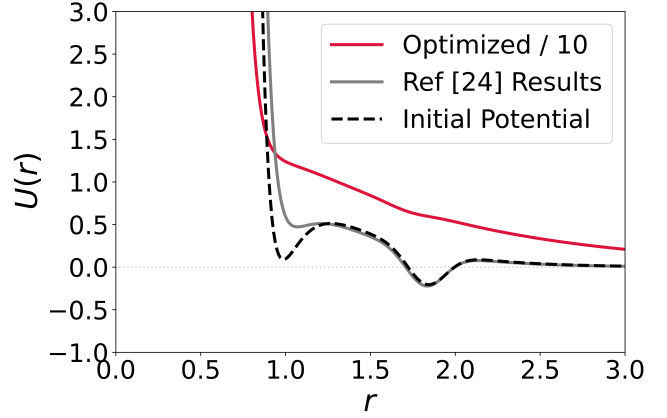

**Fig. S2.** The two potentials that drive the behavior displayed in figure 1 in the main text are pictured here. The potential that has been optimized to be half-assembled after 3,000 simulation steps is pictured in red, and the final potential found in (4) is pictured in gray. Additionally, the black dashed potential shows the potential associated with the initial parameter values in both our method and in (4). Note that the black dashed potential does not lead to assembly of a honeycomb lattice.

at the end of the first simulation. We then begin from the  
configuration  $R_{\tilde{\tau}}$  and simulate further for  $\bar{\tau} = 300$  time steps,  
returning a final configuration

$$R_{\bar{\tau}} = \mathcal{S}_{\text{MD}}(a, R_{\tilde{\tau}}, \rho, \bar{\tau}). \quad [\text{S10}]$$

Crucially, we differentiate over *only the second simulation*.  
To optimize the loss at time  $\tau = \tilde{\tau} + \bar{\tau}$ , we calculate the  
derivative

$$\left. \frac{d\mathcal{L}(\mathcal{S}_{\text{MD}}(a, R_{\tilde{\tau}}, \rho, \bar{\tau}))}{da} \right|_{R_{\tilde{\tau}}}. \quad [\text{S11}]$$

Calculating this derivative at constant  $R_{\tilde{\tau}}$  means that we  
only have to differentiate through  $\bar{\tau}$  time steps. In practice, we  
find good results with  $\bar{\tau}$  as small as 300, which we hold constant  
while varying  $\tilde{\tau}_H$  and  $\tilde{\tau}_T$  to tune the two crystallization rates  
relative to each other. Using our results, we can interpolate  
and find a relationship between  $\tilde{\tau}$  and the corresponding rate:  
 $\tilde{\tau}$  is a knob we can tune to adjust the relative lattice assembly  
rates.

### 3. Optimizing transition rates in colloidal clusters

**A. The doubly nudged elastic band calculation.** To calculate  
the transition state between two known adjacent local minima  
in a high-dimensional energy landscape, we follow the  
procedure from Trygubenko and Wales (5), which we briefly  
summarize here. We want to find the (monotonically increasing)  
steepest ascent path from the first minimum up to the transition  
state and the (monotonically decreasing) steepest descent path  
down to the second minimum.

Let  $R_0$  and  $R_{n_I+1}$  be the configurations of the two minima,  
and we will represent a path between the two as a series of  
 $n_I$  configurations  $\{R_1, R_2, \dots, R_{n_I}\}$ . As an initial guess,  
we always choose a simple interpolation between the two minima.  
Importantly, in order for this to be a reasonable guess, the two  
minima have to be rotated so that they are close to overlapping.  
The potential energy of the  $i$ -th individual configuration in the

101 path is  $U(R_i)$ , which we refer to here as the “true potential.”  
 102 Thus, the total true potential of the ensemble is

$$103 \quad V = \sum_{i=0}^{n_I+1} U(R_i). \quad [\text{S12}]$$

104 In addition, we connect each adjacent configuration with a  
 105 high-dimensional spring, leading to the following “elastic band”  
 106 or “spring” potential

$$107 \quad \tilde{V} = \frac{1}{2} k_{\text{spr}} \sum_{i=1}^{n_I+1} |R_i - R_{i-1}|^2. \quad [\text{S13}]$$

108 In principle, one wishes to minimize  $V_{\text{tot}} \equiv V + \tilde{V}$  over  
 109 all the  $n_I$  intermediate configurations while keeping the two  
 110 endpoints fixed at their respective minimum. However, inter-  
 111 ference between the true and spring potential can give rise  
 112 to “corner-cutting” and “sliding-down problems.” To address  
 113 these problems, we employ a set of adjustments, or “nudges,”  
 114 to the gradient of  $V_{\text{tot}}$ , as follows.

*Nudging.* First, we decompose the gradient of each configura-  
 tion into components that are parallel and perpendicular to  
 the current path. Let  $\hat{\tau}_i$  be the unit vector tangent to the path  
 at configuration  $i$ , which is defined as follows. If configuration  
 $i$  does not represent a local optimum, meaning exactly one of  
 its neighbors  $j$  has a higher energy,  $U(R_i) < U(R_j)$ , then its  
 tangent vector is

$$\hat{\tau}_i = \frac{(j-i)(R_j - R_i)}{|R_j - R_i|}. \quad [\text{S14}]$$

However, if either both or none of its neighbors are at higher  
 energy, then we use

$$\hat{\tau}_i = \frac{R_{i+1} - R_{i-1}}{|R_{i+1} - R_{i-1}|}. \quad [\text{S15}]$$

The gradient of the true potential can then be decomposed  
 into

$$\mathbf{g}_i = \mathbf{g}_i^{\parallel} + \mathbf{g}_i^{\perp}, \quad [\text{S16}]$$

where

$$\mathbf{g}_i^{\parallel} = (\nabla_i V \cdot \hat{\tau}_i) \hat{\tau}_i, \quad [\text{S17}]$$

$$\mathbf{g}_i^{\perp} = \nabla_i V - \mathbf{g}_i^{\parallel}. \quad [\text{S18}]$$

Similarly, using tildes to denote quantities related to the spring  
 potential,

$$\tilde{\mathbf{g}}_i = \tilde{\mathbf{g}}_i^{\parallel} + \tilde{\mathbf{g}}_i^{\perp}, \quad [\text{S19}]$$

where

$$\tilde{\mathbf{g}}_i^{\parallel} = (\nabla_i \tilde{V} \cdot \hat{\tau}_i) \hat{\tau}_i, \quad [\text{S20}]$$

$$\tilde{\mathbf{g}}_i^{\perp} = \nabla_i \tilde{V} - \tilde{\mathbf{g}}_i^{\parallel}. \quad [\text{S21}]$$

The nudged elastic band approach is to project out  $\mathbf{g}_i^{\parallel}$  and  $\tilde{\mathbf{g}}_i^{\perp}$   
 when minimizing  $V_{\text{tot}}$ . This removes some but not all of the  
 interference instabilities. The “doubly nudged” approach is to  
 only project out some of the  $\tilde{\mathbf{g}}_i^{\perp}$  term, so that

$$\mathbf{g}_i = \mathbf{g}_i^{\perp} + \tilde{\mathbf{g}}_i^{\parallel} + \tilde{\mathbf{g}}_i^{\perp} - (\tilde{\mathbf{g}}_i^{\perp} \cdot \hat{\tau}_i) \hat{\tau}_i. \quad [\text{S22}]$$

We proceed by minimizing  $V_{\text{tot}}$  using this nudged gradient.  
 We note that optimizing over such a connected ensemble is  
 especially straightforward in JAX MD because automatic  
 vectorization is natively built in. The result is a sequence of  
 configurations that closely tracks the steepest descent path  
 we are seeking. Furthermore, the image  $R_t$  with the highest  
 energy is an approximation of the true saddle point. Note  
 that we do not refine  $R_t$  using eigenvector following (6, 7), a  
 practice that is necessary for many applications. While  $R_t$  is  
 therefore only an approximation, this seems to be adequate  
 for our purposes.

**B. Optimization of transition kinetics.** As discussed in the  
 main text, we optimize the transition kinetics by first calcu-  
 lating  $R_t$  using the DNEB method, then calculating  $\frac{dL}{dB_{\alpha\beta}}$   
 using backward mode automatic differentiation, where  $L$  is  
 the chosen loss function, and finally using this gradient to  
 minimize  $L$ .

The optimization is performed using the RMSProp algo-  
 rithm as implemented in JAX (2, 3). Note that after each step  
 of the optimization, both the height  $E_t$  and the position  $R_t$   
 of the saddle point will change slightly. While it is possible  
 to differentiate over the entire DNEB calculation, this is not  
 necessary and we instead calculate  $\frac{dL}{dB_{\alpha\beta}}$  at fixed  $R_i$ ,  $R_j$ , and  
 $R_t$ . We furthermore find it unnecessary in practice to redo the  
 DNEB calculation every optimization step. Instead, we take  
 multiple optimization steps in between DNEB calculations,  
 which increases the efficiency of the computation. We find  
 that recalculating  $R_t$  every 50 optimization steps works well  
 for this problem. Note that in Fig. 3B, the iteration number  
 refers to the number of times  $R_t$  has been recalculated.

We run a total of 18 such iterations. As before, we use a  
 memory value of  $\gamma_{\text{mem}} = 0.9$ , and a smoothing value of  $\epsilon = 10^{-8}$ .  
 However, we use a variable learning rate of 0.064, 0.016,  
 and 0.004 for the first, second, and third set of 6 iterations,  
 respectively.

Finally, we note that due to the long-range tail in the  
 potential (Eq. (S2)), the exact position of the two minima  
 technically change slightly during optimization. Therefore, be-  
 fore calculating  $R_t$  each iteration, we first recalculate the local  
 minima, though in practice this does not make a significant  
 difference.

**C. Validation of transition rates using MD.** To validate the  
 transition rates, we run 100 simulations (described above)  
 for  $3 \times 10^6$  time steps each. Every  $10^4$  steps, we compare the  
 positions of the particles to the  $n_I$  images, calculated using the  
 DNEB procedure, that compose the transition path between  
 the two states. Specifically, we find the image  $i$  that minimizes  
 $\sum_{\alpha\beta} (r_{\alpha\beta} - r_{\alpha\beta,i})^2$ , where  $r_{\alpha\beta}$  is the distance between particles  
 $\alpha$  and  $\beta$  in the current state, and  $r_{\alpha\beta,i}$  is the distance between  
 the particles in image  $i$ .

The grey signal in Fig. 3C shows  $i_{\text{closest}}$  as a function of  
 time. Note that the images near 0 and 100 (roughly 0-20 and  
 80-100, see flat lines in Fig. 3B) are identical up to rotations,  
 so the distinction between them is meaningless and we do  
 not need to be concerned that the data in Fig. 3C does not  
 reach  $i_{\text{closest}} = 0$ . Note also that this signal is quite noisy, due  
 in part to fluctuations in directions that do not align with  
 the transition path. Therefore, it is important to filter this  
 signal to remove transients that do not correspond transitions

174 between the two states. This is done with a second-order  
175 lowpass Butterworth filter (see black curve in Fig. 3C).

176 This filtered signal is then matched to one of the two minima  
177 by comparing it to the image number corresponding to the  
178 transition state (purple dashed line in Fig. 3C), leading to a  
179 binarized signal (blue curve in Fig. 3C). We then calculate  
180 the average dwell time of each state,  $\tau_i$  and  $\tau_j$ . The measured  
181 rates are then  $k_{ij,MD} = 1/\tau_i$  and  $k_{ji,MD} = 1/\tau_j$ .

182 Figure S3 compares the rates extracted in this way to the rates  
183 obtained from the Kramer approximation (Eq. 4) and  
184 the target rate.

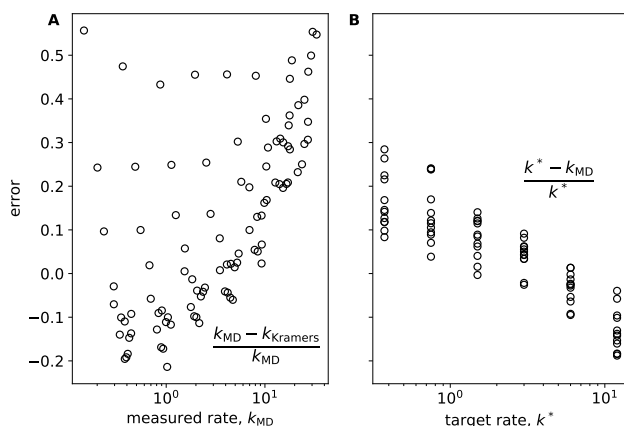

**Fig. S3.** Comparison of rates. A) Comparison of  $k_{Kramers}$  and  $k_{MD}$  when targeting desired energy barriers (see Fig. 4B). Perfect agreement is not expected because  $k_{Kramers}$  is an approximation that only considers the curvature at two points in the energy landscape, and the observed error of less than 50% is very small compared to the two orders of magnitude of variation in the rates. B) Comparison of  $k_{MD}$  and the target rate  $k^*$  when targeting desired transition rates (see Fig. 4D). Again, the observed error of mostly less than 20% is expected and very small compared to the variation in the magnitude of the rates. The comparison of  $k_{Kramers}$  and  $k^*$  is shown in Fig. 4C.

#### 185 4. Using automatic differentiation in new systems

186 In determining whether AD can be useful in studying a particu-  
187 lar system of interest there are several considerations that must  
188 be taken into account. Given a function (that could involve an  
189 entire molecular dynamics simulation) that produces a scalar  
190 output, reverse-mode AD can compute its gradients using a  
191 single pass through the simulation. However, a consequence of  
192 this is that the entire simulation trajectory must be retained  
193 during the simulation. This induces a memory cost that grows  
194 both with the size of the simulation and the number of simu-  
195 lation steps and can quickly become unmanageable. There  
196 are several ways of ameliorating this cost. First, one can use  
197 gradient rematerialization to recompute short segments of the  
198 simulation during the backward pass. This typically reduces  
199 the memory cost to scale logarithmically in the duration of the  
200 simulation at the cost of a logarithmic increase in the required  
201 computational budget. Another option employed here is to use  
202 forward-mode AD which does not require additional storage  
203 during the simulation. However, here one pass through the  
204 entire simulation is required for each parameter and so the  
205 computational complexity grows quickly with the number of  
206 parameters in the function to be differentiated.

1. SS Schoenholz, ED Cubuk, JAX, M.D.: End-to-End Differentiable, Hardware Accelerated, Molecular Dynamics in Pure Python. *arXiv* (2019). 207
2. J Bradbury, et al., JAX: composable transformations of Python+NumPy programs. (2018). 208
3. T Tieleman, G Hinton, Lecture 6.5-rmsprop: Divide the gradient by a running average of its recent magnitude. *COURSERA: Neural networks for machine learning* 4, 26–31 (2012). 210
4. MC Rechtsman, FH Stillinger, S Torquato, Optimized interactions for targeted self-assembly: application to a honeycomb lattice. *Phys. Rev. Lett.* 95, 228301 (2005). 212
5. SA Trygubenko, DJ Wales, A doubly nudged elastic band method for finding transition states. *J. Chem. Phys.* 120, 2082–2094 (2004). 214
6. CJ Cerjan, WH Miller, On finding transition states. *J. Chem. Phys.* 75, 2800–2806 (1981). 216
7. DJ Wales, Finding saddle points for clusters. *J. Chem. Phys.* 91, 7002–7010 (1989). 217
